# Supplementary material
Source: ML conference proceedings conference paper supplement (https://proceedings.neurips.cc/paper_files/paper/2018/hash/3b5020bb891119b9f5130f1fea9bd773-Abstract.html)
Supplement: Supplementary file [file 3b5020bb891119b9f5130f1fea9bd773-Supplemental.zip]

## A Plots of Privacy Profiles

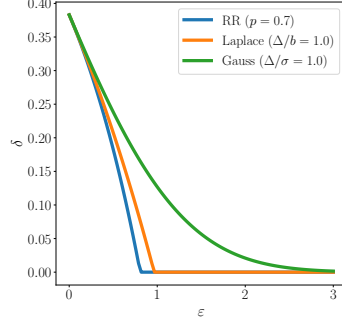

(a) Privacy profiles with mechanisms calibrated to provide the same  $\delta$  at  $\varepsilon = 0$ . Profile expressions are given in Section 5 (RR), Theorem 3 (Laplace), and Theorem 4 (Gauss).

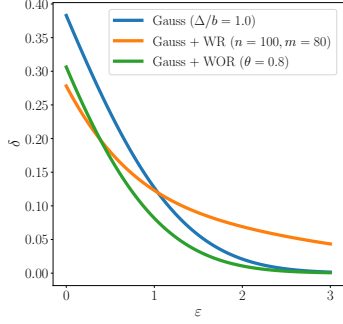

(b) Subsampled Gaussian mechanism. Comparison between sampling without replacement (Theorem 9) and with replacement (Theorem 10, with white-box group privacy), both with the same subsampled dataset sizes.

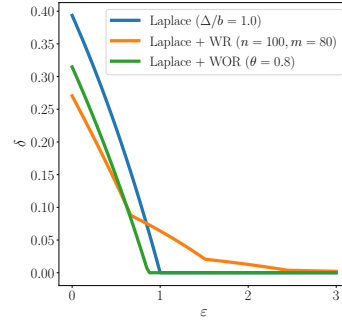

(c) Subsampled Laplace mechanism. Comparison between sampling without replacement (Theorem 9) and with replacement (Theorem 10, with white-box group privacy), both with the same subsampled dataset sizes.

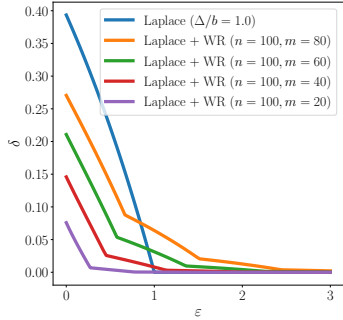

(d) Subsampled Laplace mechanism. Impact of group-privacy effect in sampling with replacement (white-box group privacy).

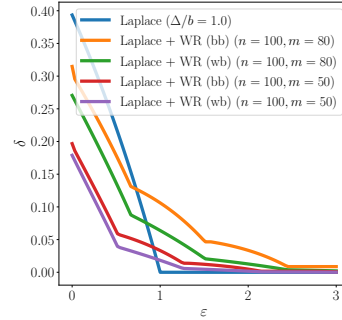

(e) Subsampled Laplace mechanism. Impact of white-box vs. black-box group-privacy in sampling with replacement.

Figure 1: Plots of privacy profiles. Results illustrate the notion of privacy profile and the different subsampling bounds derived in the paper.

## B Proofs from Section 3

*Proof of Theorem 2.* It suffices to check that for any  $z \in Z$ ,

$$[\mu(z) - \alpha' \mu'(z)]_+ = \eta [\mu_1(z) - \alpha ((1 - \beta)\mu_0(z) + \beta\mu'_1(z))]_+ .$$

Plugging this identity in the definition of  $D_{\alpha'}$  we get the desired equality

$$D_{\alpha'}(\mu \parallel \mu') = \eta D_{\alpha}(\mu_1 \parallel (1 - \beta)\mu_0 + \beta\mu'_1) .$$

□

*Proof of Theorem 3.* Suppose  $x \simeq_X x'$  and assume without loss of generality that  $y = f(x) = 0$  and  $y' = f(x) = \Delta > 0$ . Plugging the density of the Laplace distribution in the definition of  $\alpha$ -divergence we get

$$D_{e^\varepsilon}(\text{Lap}(b) \parallel \Delta + \text{Lap}(b)) = \frac{1}{2b} \int_{\mathbb{R}} \left[ e^{-\frac{|z|}{b}} - e^\varepsilon e^{-\frac{|z-\Delta|}{b}} \right]_+ dz .$$

Now we observe that the quantity inside the integral above is positive if and only if  $|z - \Delta| - |z| \geq \varepsilon b$ . Since  $||z + \Delta| - |z|| \leq \Delta$ , we see that the divergence is zero for  $\varepsilon > \Delta/b$ . On the other hand, for  $\varepsilon \in [0, \Delta/b]$  we have  $\{z : |z - \Delta| - |z| \geq \varepsilon b\} = (-\infty, (\Delta - \varepsilon b)/2]$ . Thus, we have

$$\frac{1}{2b} \int_{\mathbb{R}} \left[ e^{-\frac{|z|}{b}} - e^\varepsilon e^{-\frac{|z-\Delta|}{b}} \right]_+ dz = \frac{1}{2b} \int_{-\infty}^{(\Delta - \varepsilon b)/2} e^{-\frac{|z|}{b}} dz - \frac{e^\varepsilon}{2b} \int_{-\infty}^{(\Delta - \varepsilon b)/2} e^{-\frac{|z-\Delta|}{b}} dz .$$

Now we can compute both integrals as probabilities under the Laplace distribution:

$$\begin{aligned} \frac{1}{2b} \int_{-\infty}^{(\Delta - \varepsilon b)/2} e^{-\frac{|z|}{b}} dz &= \Pr \left[ \text{Lap}(b) \leq \frac{\Delta - \varepsilon b}{2} \right] \\ &= 1 - \frac{1}{2} \exp \left( \frac{\varepsilon b - \Delta}{2b} \right) , \\ \frac{e^\varepsilon}{2b} \int_{-\infty}^{(\Delta - \varepsilon b)/2} e^{-\frac{|z-\Delta|}{b}} dz &= e^\varepsilon \Pr \left[ \text{Lap}(b) \leq \frac{-\Delta - \varepsilon b}{2} \right] \\ &= \frac{e^\varepsilon}{2} \exp \left( \frac{-\varepsilon b - \Delta}{2b} \right) . \end{aligned}$$

Putting these two quantities together we finally get, for  $\varepsilon \leq \Delta/b$ :

$$D_{e^\varepsilon}(\text{Lap}(b) \parallel \Delta + \text{Lap}(b)) = 1 - \exp \left( \frac{\varepsilon}{2} - \frac{\Delta}{2b} \right) .$$

□

*Proof of Theorem 6.* Let  $\varphi = \varphi_{\mathcal{M}}^{x, x'}$ ,  $L = L_{\mathcal{M}}^{x, x'}$ ,  $\tilde{\varphi} = \varphi_{\mathcal{M}}^{x', x}$ , and  $\tilde{L} = L_{\mathcal{M}}^{x', x}$ . Recall that for any non-negative random variable  $\mathbf{z}$  one has  $\mathbb{E}[\mathbf{z}] = \int_0^\infty \Pr[\mathbf{z} > t] dt$ . We use this to write the moment generating function of the corresponding privacy loss random variable for  $s \geq 0$  as follows:

$$\begin{aligned} \varphi(s) &= \int_0^\infty \Pr[e^{sL} > t] dt \\ &= \int_0^\infty \Pr \left[ \frac{p(\mathbf{z})}{q(\mathbf{z})} > t^{1/s} \right] dt , \end{aligned}$$

where  $\mathbf{z} \sim \mu$ , and  $p$  and  $q$  represent the densities of  $\mu$  and  $\nu$  with respect to a fixed base measure. Next we observe the probability inside the integral above can be decomposed in terms of a divergence

and a second integral with respect to  $q$ :

$$\begin{aligned}
\Pr \left[ \frac{p(\mathbf{z})}{q(\mathbf{z})} > t^{1/s} \right] &= \Pr[p(\mathbf{z}) > t^{1/s} q(\mathbf{z})] \\
&= \mathbb{E}_\mu \left[ \mathbb{I}[p > t^{1/s} q] \right] \\
&= \int \mathbb{I}[p(z) > t^{1/s} q(z)] p(z) dz \\
&= \int \mathbb{I}[p(z) > t^{1/s} q(z)] (p(z) - t^{1/s} q(z)) dz + t^{1/s} \int \mathbb{I}[p(z) > t^{1/s} q(z)] q(z) dz \\
&= \int [p(z) - t^{1/s} q(z)]_+ dz + t^{1/s} \int \mathbb{I}[p(z) > t^{1/s} q(z)] q(z) dz \\
&= D_{t^{1/s}}(\mu \| \mu') + t^{1/s} \int \mathbb{I}[p(z) > t^{1/s} q(z)] q(z) dz .
\end{aligned}$$

Note the term  $D_{t^{1/s}}(\mu \| \mu')$  above is not a divergence when  $t^{1/s} < 1$ . The integral term above can be re-written as a probability in terms of  $\tilde{L}$  as follows:

$$\begin{aligned}
\int \mathbb{I}[p(z) > t^{1/s} q(z)] q(z) dz &= \Pr[p(\mathbf{z}') > t^{1/s} q(\mathbf{z}')] \\
&= \Pr \left[ \frac{p(\mathbf{z}')}{q(\mathbf{z}')} > t^{1/s} \right] \\
&= \Pr \left[ e^{-\tilde{L}} > t^{1/s} \right] ,
\end{aligned}$$

where  $\mathbf{z}' \sim \mu'$ . Thus, integrating with respect to  $t$  we get an expression for  $\varphi(s)$  involving two terms that we will need to massage further:

$$\varphi(s) = \int_0^\infty D_{t^{1/s}}(\mu \| \mu') dt + \int_0^\infty t^{1/s} \Pr \left[ e^{-\tilde{L}} > t^{1/s} \right] dt .$$

To compute the second integral in the RHS above we perform the change of variables  $dt' = t^{1/s} dt$ , which comes from taking  $t' = t^{1+1/s}/(1+1/s)$ , or, equivalently,  $t = ((1+1/s)t')^{1/(1+1/s)}$ . This allows us to introduce the moment generating function of  $\tilde{L}$  as follows:

$$\begin{aligned}
\int_0^\infty t^{1/s} \Pr \left[ e^{-\tilde{L}} > t^{1/s} \right] dt &= \int_0^\infty \Pr \left[ e^{-\tilde{L}} > ((1+1/s)t')^{1/(s+1)} \right] dt' \\
&= \int_0^\infty \Pr \left[ \frac{s}{s+1} e^{-(s+1)\tilde{L}} > t' \right] dt' \\
&= \frac{s}{s+1} \mathbb{E} \left[ e^{-(s+1)\tilde{L}} \right] \\
&= \frac{s}{s+1} \tilde{\varphi}(-s-1) .
\end{aligned}$$

Putting the derivations above together and substituting  $\tilde{\varphi}(-s-1)$  for  $\varphi(s)$  we see that

$$\varphi(s) = \frac{s}{s+1} \varphi(s) + \int_0^\infty D_{t^{1/s}}(\mu \| \mu') dt ,$$

or equivalently:

$$\varphi(s) = (s+1) \int_0^\infty D_{t^{1/s}}(\mu \| \mu') dt .$$

Now we observe that some terms in the integral above cannot be bounded using an  $\alpha$ -divergence between  $\mu$  and  $\mu'$ , e.g. for  $t \in (0, 1)$  the term  $D_{t^{1/s}}(\mu \| \mu')$  is not a divergence. Instead, using the definition of  $D_{t^{1/s}}(\mu \| \mu')$  we can see that these terms are equal to by  $1 - t^{1/s} + t^{1/s} D_{t^{-1/s}}(\mu' \| \mu)$ ,

where the last term is now a divergence. Thus, we split the integral in the expression for  $\varphi(s)$  into two parts and obtain

$$\begin{aligned}\varphi(s) &= (s+1) \int_0^1 \left(1 - t'^{1/s} + t'^{1/s} D_{t'^{-1/s}}(\mu' \parallel \mu)\right) dt' + (s+1) \int_1^\infty D_{t^{1/s}}(\mu \parallel \mu') dt \\ &= 1 + (s+1) \int_0^1 t'^{1/s} D_{t'^{-1/s}}(\mu' \parallel \mu) dt' + (s+1) \int_1^\infty D_{t^{1/s}}(\mu \parallel \mu') dt .\end{aligned}$$

Finally, we can obtain the desired equation by performing a series of simple changes of variables  $t' = 1/t$ ,  $\alpha = t^{1/s}$ , and  $\alpha = e^\varepsilon$ :

$$\begin{aligned}\varphi(s) &= 1 + (s+1) \int_1^\infty t^{-2-1/s} D_{t^{1/s}}(\mu' \parallel \mu) dt + (s+1) \int_1^\infty D_{t^{1/s}}(\mu \parallel \mu') dt \\ &= 1 + s(s+1) \int_1^\infty (\alpha^{s-1} D_\alpha(\mu \parallel \mu') + \alpha^{-s-2} D_\alpha(\mu' \parallel \mu)) d\alpha \\ &= 1 + s(s+1) \int_0^\infty \left(e^{s\varepsilon} D_{e^\varepsilon}(\mu \parallel \mu') + e^{-(s+1)\varepsilon} D_{e^\varepsilon}(\mu' \parallel \mu)\right) d\varepsilon .\end{aligned}$$

□

*Proof of Theorem 7.* The result follows from a few simple observations. The first observation is that for any coupling  $\pi \in C(\nu, \nu')$  and  $y \in \text{supp}(\nu')$  we have

$$\begin{aligned}\sum_{y'} \pi_{y,y'} \delta_{\mathcal{M},d(y,y')}(\varepsilon) &\geq \sum_{y'} \pi_{y,y'} \delta_{\mathcal{M},d(y,\text{supp}(\nu'))}(\varepsilon) \\ &= \sum_y \nu_y \delta_{\mathcal{M},d(y,\text{supp}(\nu'))}(\varepsilon) ,\end{aligned}$$

where the first inequality follows from  $d(y, y') \geq d(y, \text{supp}(\nu'))$  and the fact that  $\delta_{\mathcal{M},k}(\varepsilon)$  is monotonically increasing with  $k$ . Thus the RHS of (6) is always a lower bound for the LHS. Now let  $\pi$  be a  $d_Y$ -compatible coupling. Since the support of  $\pi$  only contains pairs  $(y, y')$  such that  $d(y, y') = d(y, \text{supp}(\nu'))$ , we see that

$$\sum_{y,y'} \pi_{y,y'} \delta_{\mathcal{M},d(y,y')}(\varepsilon) = \sum_{y,y'} \pi_{y,y'} \delta_{\mathcal{M},d(y,\text{supp}(\nu'))}(\varepsilon) = \sum_y \nu_y \delta_{\mathcal{M},d(y,\text{supp}(\nu'))}(\varepsilon) .$$

The result follows. □

## C Proofs from Section 4

*Proof of Theorem 8.* Using the tools from Section 3, the analysis is quite straightforward. Given  $x, x' \in \mathcal{X}$  with  $x \simeq_r x'$ , we write  $\omega = \mathcal{S}_\eta^{\text{wo}}(x)$  and  $\omega' = \mathcal{S}_\eta^{\text{wo}}(x')$  and note that  $\text{TV}(\omega, \omega') = \eta$ . Next we define  $x_0 = x \cap x'$  and observe that either  $x_0 = x$  or  $x_0 = x'$  by the definition of  $\simeq_r$ . Let  $\omega_0 = \mathcal{S}_\eta^{\text{po}}(x_0)$ . Then the decompositions of  $\omega$  and  $\omega'$  induced by their maximal coupling have either  $\omega_1 = \omega_0$  when  $x = x_0$  or  $\omega'_1 = \omega_0$  when  $x' = x_0$ . Noting that applying advanced jointed convexity in the former case leads to an additional cancellation we see that the maximum will be attained when  $x' = x_0$ . In this case the distribution  $\omega_1$  is given by  $\omega_1(y \cup \{v\}) = \omega_0(y)$ . This observation yields an obvious  $d_{\simeq_r}$ -compatible coupling between  $\omega_1$  and  $\omega_0 = \omega'_1$ : first sample  $y'$  from  $\omega_0$  and then build  $y$  by adding  $v$  to  $y'$ . Since every pair of datasets generated by this coupling has distance one with respect to  $d_{\simeq_r}$ , Theorem 7 yields the bound  $\delta_{\mathcal{M}'}(\varepsilon') \leq \eta \delta_{\mathcal{M}}(\varepsilon)$ . □

*Proof of Theorem 9.* The analysis proceeds along the lines of the previous proof. First we note that for any  $x, x' \in \mathcal{X}_n^{\text{wo}}$  with  $x \simeq_s x'$ , the total variation distance between  $\omega = \mathcal{S}_m^{\text{wo}}(x)$  and  $\omega' = \mathcal{S}_m^{\text{wo}}(x')$  is given by  $\eta = \text{TV}(\omega, \omega') = m/n$ . Applying advanced joint convexity (Theorem 2) with the decompositions  $\omega = (1-\eta)\omega_0 + \eta\omega_1$  and  $\omega' = (1-\eta)\omega_0 + \eta\omega'_1$  given by the maximal coupling, the analysis of  $D_{e^\varepsilon}(\omega M \parallel \omega' M)$  reduces to bounding the divergences  $D_{e^\varepsilon}(\omega_1 M \parallel \omega_0 M)$  and  $D_{e^\varepsilon}(\omega'_1 M \parallel \omega_0 M)$ . In this case both quantities can be bounded by  $\delta_{\mathcal{M}}(\varepsilon)$  by constructing appropriate  $d_{\simeq_s}$ -compatible couplings and combining (5) with Theorem 7.

We construct the couplings as follows. Suppose  $v, v' \in \mathcal{U}$  are the elements where  $x$  and  $x'$  differ:  $x_v = x'_v + 1$  and  $x'_{v'} = x_v + 1$ . Let  $x_0 = x \cap x'$ . Then we have  $\omega_0 = \mathcal{S}_m^{\text{wo}}(x_0)$ . Furthermore, writing  $\tilde{\omega}_1 = \mathcal{S}_{m-1}^{\text{wo}}(x_0)$  we have  $\omega_1(y) = \tilde{\omega}_1(y \cap x_0)$  and  $\omega'_1(y) = \tilde{\omega}_1(y \cap x_0)$ . Using these definitions we build a coupling  $\pi_{1,1}$  between  $\omega_1$  and  $\omega'_1$  through the following generative process: sample  $y_0$  from  $\tilde{\omega}_1$  and then let  $y = y_0 \cup \{v\}$  and  $y' = y_0 \cup \{v'\}$ . Similarly, we build a coupling  $\pi_{1,0}$  between  $\omega_1$  and  $\omega_0$  as follows: sample  $y_0$  from  $\tilde{\omega}_1$ , sample  $u$  uniformly from  $x_0 \setminus y_0$ , and then let  $y = y_0 \cup \{v\}$  and  $y' = y_0 \cup \{u\}$ . It is obvious from these constructions that  $\pi_{1,1}$  and  $\pi_{0,1}$  are both  $d_{\sim_s}$ -compatible. Plugging these observations together, we get  $\delta_{\mathcal{M}'}(\varepsilon') \leq (m/n)\delta_{\mathcal{M}}(\varepsilon)$ .  $\square$

*Proof of Theorem 10.* To bound the privacy profile of the subsampled mechanism  $\mathcal{M}^{\text{wr}}_m$  on  $\mathcal{X}_n^{\mathcal{U}}$  with respect to  $\simeq_s$  we start by noting that taking  $x, x' \in \mathcal{X}_n^{\mathcal{U}}$ ,  $x \simeq_s x'$ , the total variation distance between  $\omega = \mathcal{S}_m^{\text{wr}}(x)$  and  $\omega' = \mathcal{S}_m^{\text{wr}}(x')$  is given by  $\eta = \text{TV}(\omega, \omega') = 1 - (1 - 1/n)^m$ . To define appropriate mixture components for applying the advanced joint composition property we write  $v$  and  $v'$  for the elements where  $x$  and  $x'$  differ and  $x_0 = x \cap x'$  for the common part between both datasets. Then we have  $\omega_0 = \mathcal{S}_m^{\text{wr}}(x_0)$ . Furthermore,  $\omega_1$  is the distribution obtained from sampling  $\tilde{y}$  from  $\tilde{\omega}_1 = \mathcal{S}_{m-1}^{\text{wr}}(x_0)$  and building  $y$  by adding one occurrence of  $v$  to  $\tilde{y}$ . Similarly, sampling  $y'$  from  $\omega'_1$  corresponds to adding  $v'$  to a multiset sampled from  $\mathcal{S}_{m-1}^{\text{wr}}(x')$ .

Now we construct appropriate distance-compatible couplings. First we let  $\pi_{1,1} \in \mathbb{P}(\mathbb{N}_m^{\mathcal{U}} \times \mathbb{N}_m^{\mathcal{U}})$  be the distribution given by sampling  $y$  from  $\omega_1$  as above and outputting the pair  $(y, y')$  obtained by replacing each  $v$  in  $y$  by  $v'$ . It is immediate from this construction that  $\pi_{1,1}$  is a  $d_{\sim_s}$ -compatible coupling between  $\omega_1$  and  $\omega'_1$ . Furthermore, using the notation from Theorem 7 and the construction of the maximal coupling, we see that for  $k \geq 1$ :

$$\omega_1(Y_k) = \frac{\omega(Y_k) - (1 - \eta)\omega_0(Y_k)}{\eta} = \frac{\Pr_{y \sim \omega}[y_v = k]}{\eta} = \frac{1}{\eta} \binom{m}{k} \left(\frac{1}{n}\right)^k \left(1 - \frac{1}{n}\right)^{m-k},$$

where we used  $\omega_0(Y_k) = 0$  since  $\omega_0$  is supported on multisets that do not include  $v$ . Therefore, the distributions  $\mu_1 = \omega_1 M$  and  $\mu'_1 = \omega'_1 M$  satisfy

$$\eta D_{e^\varepsilon}(\mu_1 \| \mu'_1) \leq \sum_{k=1}^m \binom{m}{k} \left(\frac{1}{n}\right)^k \left(1 - \frac{1}{n}\right)^{m-k} \delta_{\mathcal{M},k}(\varepsilon). \quad (7)$$

On the other hand, we can build a  $d_{\sim_s}$ -compatible coupling between  $\omega_1$  and  $\omega_0$  by first sampling  $y$  from  $\omega_1$  and then replacing each occurrence of  $v$  by an element picked uniformly at random from  $x_0$ . Again, this shows that  $D_{e^\varepsilon}(\mu_1 \| \mu_0)$  is upper bounded by the right hand side of (7).

Therefore, we conclude that

$$\delta_{\mathcal{M}'}(\varepsilon') \leq \sum_{k=1}^m \binom{m}{k} \left(\frac{1}{n}\right)^k \left(1 - \frac{1}{n}\right)^{m-k} \delta_{\mathcal{M},k}(\varepsilon). \quad \square$$

*Proof of Theorem 11.* Suppose  $x \simeq_r x'$  with  $|x| = n$  and  $|x'| = n - 1$ . This is the worst-case direction for the neighbouring relation like in the proof of Theorem 8. Let  $\omega = \mathcal{S}_m^{\text{wr}}(x)$  and  $\omega' = \mathcal{S}_m^{\text{wr}}(x')$ . We have  $\eta = \text{TV}(\omega, \omega') = 1 - (1 - 1/n)^m$ , and the factorization induced by the maximal coupling has  $\omega_0 = \omega'_1 = \omega'$  and  $\omega_1$  is given by first sampling  $\tilde{y}$  from  $\mathcal{S}_{m-1}^{\text{wr}}(x)$  and then producing  $y$  by adding to  $\tilde{y}$  a copy of the element  $v$  where  $x$  and  $x'$  differ. This definition of  $\omega_1$  suggests the following coupling between  $\omega_1$  and  $\omega_0$ : first sample  $y$  from  $\omega_1$ , then produce  $y'$  by replacing each copy of  $v$  with a element from  $x'$  sampled independently and uniformly. By construction we see that this coupling is  $d_{\sim_s}$ -compatible, so we can apply Theorem 7. Using the same argument as in the proof of Theorem 10 we see that  $\eta \omega_1(Y_k) = \binom{m}{k} (1/n)^k (1 - 1/n)^{m-k}$ . Thus, we finally get

$$\begin{aligned} D_{e^{\varepsilon'}}(\mathcal{M}^{\text{wr}}_m(x) \| \mathcal{M}^{\text{wr}}_m(x')) &= \eta D_{e^\varepsilon}(\omega_1 M \| \omega_0 M) \\ &\leq \eta \sum_{k=1}^m \omega_1(Y_k) \delta_{\mathcal{M},k}(\varepsilon) \\ &= \sum_{k=1}^m \binom{m}{k} \left(\frac{1}{n}\right)^k \left(1 - \frac{1}{n}\right)^{m-k} \delta_{\mathcal{M},k}(\varepsilon). \end{aligned}$$

□

**Theorem 14.** Let  $\mathcal{M} : \mathcal{Z}^{\mathcal{U}} \rightarrow \mathbb{P}(Z)$  be a mechanism with privacy profile  $\delta_{\mathcal{M}}$  with respect to  $\simeq_s$ . Then the privacy profile with respect to  $\simeq_s$  of the subsampled mechanism  $\mathcal{M}' = \mathcal{M}^{S_{\gamma}^{\text{po}}} : \mathcal{Z}_n^{\mathcal{U}} \rightarrow \mathbb{P}(Z)$  on datasets of size  $n$  satisfies the following:

$$\delta_{\mathcal{M}'}(\varepsilon') \leq \gamma\beta\delta_{\mathcal{M}}(\varepsilon) + \gamma(1 - \beta) \left( \sum_{k=1}^{n-1} \tilde{\gamma}_k \delta_{\mathcal{M}}(\varepsilon_k) + \tilde{\gamma}_n \right),$$

where  $\varepsilon' = \log(1 + \gamma(e^{\varepsilon} - 1))$ ,  $\beta = e^{\varepsilon'}/e^{\varepsilon}$ ,  $\varepsilon_k = \varepsilon + \log(\frac{\gamma}{1-\gamma}(\frac{n}{k} - 1))$ , and  $\tilde{\gamma}_k = \binom{n-1}{k-1} \gamma^{k-1} (1 - \gamma)^{n-k}$ .

*Proof of Theorem 14.* Suppose  $x, x' \in \mathcal{Z}_n^{\mathcal{U}}$  are sets of size  $n$  related by the substitution relation  $\simeq_s$ . Let  $\omega = S_{\eta}^{\text{po}}(x)$  and  $\omega' = S_{\eta}^{\text{po}}(x')$  and note that  $\text{TV}(\omega, \omega') = \eta$ . Let  $x_0 = x \cap x'$  and  $v = x \setminus x_0$ ,  $v' = x' \setminus x_0$ . In this case the factorization induced by the maximal coupling is obtained by taking  $\omega_0 = S_{\eta}^{\text{po}}(x_0)$ ,  $\omega_1(y \cup \{v\}) = \omega_0(y)$ , and  $\omega'_1(y \cup \{v'\}) = \omega_0(y)$ . From this factorization we see it is easy to construct a coupling  $\pi_{1,1}$  between  $\omega_1$  and  $\omega'_1$  that is  $d_{\simeq_s}$ -compatible. Therefore we have  $D_{e^{\varepsilon}}(\omega_1 M \| \omega'_1 M) \leq \delta_{\mathcal{M}}(\varepsilon)$ .

Since we have already identified that no  $d_{\simeq_s}$ -compatible coupling between  $\omega_1$  and  $\omega_0$  can exist, we shall further decompose these distributions “by hand”. Let  $\nu_k = S_k^{\text{wo}}(x_0)$  and note that  $\nu_k$  corresponds to the distribution  $\omega_0$  conditioned on  $|y| = k$ . Similarly, we define  $\tilde{\nu}_k$  as the distribution corresponding to sampling  $\tilde{y}$  from  $S_{k-1}^{\text{wo}}(x_0)$  and outputting the set  $y$  obtained by adding  $v$  to  $\tilde{y}$ . Then  $\tilde{\nu}_k$  equals the distribution of  $\omega_1$  conditioned on  $|y| = k$ . Now we write  $\gamma_k = \Pr_{y \sim \omega_0}[|y| = k] = \binom{n-1}{k} \gamma^k (1 - \gamma)^{n-1-k}$  and  $\tilde{\gamma}_k = \Pr_{y \sim \omega_1}[|y| = k] = \binom{n-1}{k-1} \gamma^{k-1} (1 - \gamma)^{n-k}$ . With these notations we can write the decompositions  $\omega_0 = \sum_{k=0}^{n-1} \gamma_k \nu_k$  and  $\omega_1 = \sum_{k=1}^n \tilde{\gamma}_k \tilde{\nu}_k$ . Further, we observe that the construction of  $\tilde{\nu}_k$  and  $\nu_k$  shows there exist  $d_{\simeq_s}$ -compatible couplings between these pairs of distributions when  $1 \leq k \leq n-1$ , leading to  $D_{e^{\varepsilon}}(\tilde{\nu}_k M \| \nu_k M) \leq \delta_{\mathcal{M}}(\varepsilon)$ . To exploit this fact we first write

$$D_{e^{\varepsilon}}(\omega_1 M \| \omega_0 M) = D_{e^{\varepsilon}} \left( \sum_{k=1}^{n-1} \tilde{\gamma}_k \tilde{\nu}_k M + \tilde{\gamma}_n \tilde{\nu}_n M \left\| \gamma_0 \nu_0 M + \sum_{k=1}^{n-1} \gamma_k \nu_k M \right. \right).$$

Now we use that  $\alpha$ -divergences can be applied to arbitrary non-negative measures, which are not necessarily probability measures, using the same definition we have used so far. Under this relaxation, given non-negative measures  $\nu_i, \nu'_i, i = 1, 2$ , on a measure space  $Z$  we have  $D_{\alpha}(\nu_1 + \nu_2 \| \nu'_1 + \nu'_2) \leq D_{\alpha}(\nu_1 \| \nu'_1) + D_{\alpha}(\nu_2 \| \nu'_2)$ ,  $D_{\alpha}(a\nu_1 \| b\nu_2) = aD_{\alpha b/a}(\nu_1 \| \nu_2)$  for  $a \geq 0$  and  $b > 0$ , and  $D_{\alpha}(\nu_1 \| 0) = \nu_1(Z)$ . Using these properties on the decomposition above we see that

$$\begin{aligned} D_{e^{\varepsilon}}(\omega_1 M \| \omega_0 M) &\leq \sum_{k=1}^{n-1} \tilde{\gamma}_k D_{e^{\varepsilon_k}}(\tilde{\nu}_k M \| \nu_k M) + \tilde{\gamma}_n \\ &\leq \sum_{k=1}^{n-1} \tilde{\gamma}_k \delta_{\mathcal{M}}(\varepsilon_k) + \tilde{\gamma}_n, \end{aligned}$$

where  $e^{\varepsilon_k} = (\gamma_k / \tilde{\gamma}_k) e^{\varepsilon} = (\gamma / (1 - \gamma))(n/k - 1) e^{\varepsilon}$ . □

## D Proofs from Section 5

*Proof of Lemma 12.* We start by observing that for any  $x \in X$  the distribution  $\mu = \mathcal{M}_{v,p}^S(x)$  must be a mixture  $\mu = (1 - \theta)\nu_0 + \theta\nu_1$  for some  $\theta \in [0, 1]$ . This follows from the fact that there are only two possibilities  $\nu_0$  and  $\nu_1$  for  $\mathcal{M}_{v,p}(y)$  depending on whether  $v \notin y$  or  $v \in y$ . Similarly, taking  $x \simeq_X x'$  we get  $\mu' = \mathcal{M}_{v,p}^S(x')$  with  $\mu' = (1 - \theta')\nu_0 + \theta'\nu_1$  for some  $\theta' \in [0, 1]$ . Assuming (without loss of generality)  $\theta \geq \theta'$ , we use the advanced joint convexity property of  $D_{\alpha}$  to get

$$\begin{aligned} D_{e^{\varepsilon'}}(\mu \| \mu') &= \theta D_{e^{\varepsilon}}(\nu_1 \| (1 - \theta'/\theta)\nu_0 + (\theta'/\theta)\nu_1) \\ &\leq \theta(1 - \theta'/\theta) D_{e^{\varepsilon}}(\nu_1 \| \nu_0) = (\theta - \theta') \psi_p(\varepsilon) \leq \theta \psi_p(\varepsilon), \end{aligned}$$

where  $\varepsilon' = \log(1 + \theta(e^\varepsilon - 1))$  and  $\beta = e^{\varepsilon'}/e^\varepsilon$ , and the inequality follows from joint convexity. Now note the inequalities above are in fact equalities when  $\theta' = 0$ , which is equivalent to the fact  $v \notin x'$  because  $\mathcal{S}$  is a natural subsampling mechanism. Thus, observing that the function  $\theta \mapsto \theta\psi_p(\log(1 + (e^{\varepsilon'} - 1)/\theta))$  is monotonically increasing, we get

$$\begin{aligned} \sup_{x \simeq_X x'} D_{e^{\varepsilon'}}(\mathcal{M}_{v,p}^{\mathcal{S}}(x) \| \mathcal{M}_{v,p}^{\mathcal{S}}(x')) &= \sup_{x \simeq_X x', v \notin x'} \theta\psi_p(\log(1 + (e^{\varepsilon'} - 1)/\theta)) \\ &= \eta\psi_p(\log(1 + (e^{\varepsilon'} - 1)/\eta)) = \eta\psi_p(\varepsilon) . \end{aligned}$$

□
